# Supplementary material
Source: PubMed Central journal article supplement (PMC6211239)

## Web Material

### Harmonization of Respiratory Data From Nine US Population-Based Cohorts: The NHLBI Pooled Cohorts Study

Elizabeth C. Oelsner, Pallavi P. Balte, Pat Cassano, David Couper, Paul L. Enright, Aaron R. Folsom, John Hankinson, David R. Jacobs, Jr., Ravi Kalhan, Robert Kaplan, Richard Kronmal, Leslie Lange, Laura R. Loehr, Stephanie J. London, Ana Navas Acien, Anne B. Newman, George T. O'Connor, Joseph E. Schwartz, Lewis J Smith, Fawn Yeh, Yiyi Zhang, Andrew E. Moran, Stanford Mwasongwe, Wendy B. White, Sachin Yende, and R. Graham Barr

#### Contents

**Web Table 1.** Harmonized Variable List, the NHLBI Pooled Cohorts Study.

**Web Table 2.** Respiratory Data Completeness, the NHLBI Pooled Cohorts Study, 1983-2016.

**Web Table 3.** Within- and Between-Individual Variability in Spirometry Measures According to Harmonized Quality Rubric, the NHLBI Pooled Cohorts Study, United States, 1983-2016.

**Web Figure 1.** Timeline for Exams Among Cohorts Included in the Pooled Cohorts Study, United States, 1983-2016. Study logos used with cohorts' written permission. ARIC = Atherosclerosis Risk in Communities; CARDIA = Coronary Artery Risk Development in Young Adults; CHS = Cardiovascular Health Study; FHS-O = Framingham Offspring Study; HABC = Health ABC; HCHS/SOL = Hispanic Community Health Study/Study of Latinos; JHS = Jackson Heart Study; MESA = Multi-Ethnic Study of Atherosclerosis; SHS = Strong Heart Study.

**Web Figure 2.** Flow Chart of Longitudinal Lung Function Data in the Atherosclerosis Risk In Communities Study, by Visit, United States, 1989-2013.

**Web Figure 3.** Flow Chart of Longitudinal Lung Function Data in the Coronary Artery Risk Development in Young Adults Study, by Visit, United States, 1985-2011.

**Web Figure 4.** Flow Chart of Longitudinal Lung Function Data in the Cardiovascular Health Study, by visit, United States, 1989-2006.

**Web Figure 5.** Flow Chart of Longitudinal Lung Function Data in the Framingham Heart Study-Offspring cohort, by Visit, United States, 1983-2014.

**Web Figure 6.** Flow Chart of Longitudinal Lung Function Data in the Health, Aging and Body Composition Study, by Visit, United States, 1997-2006.

**Web Figure 7.** Flow Chart of Longitudinal Lung Function Data in the Multi-Ethnic Study of Atherosclerosis, by Visit, United States, 2003-2012.

**Web Table 1.** Harmonized Variable List, the NHLBI Pooled Cohorts Study.

| Variable name      | Label                                                                                                                                    |
|--------------------|------------------------------------------------------------------------------------------------------------------------------------------|
| Identifying data   |                                                                                                                                          |
| newid              | Unique id for participants from all cohorts                                                                                              |
| study              | Name of cohort, categorical: aric, card, chs, habc, fhs, mesa, hchs/sol, shs                                                             |
| exam               | Exam/visit                                                                                                                               |
| Socio-demographics |                                                                                                                                          |
| age                | Age (years), time variant                                                                                                                |
| age_baseline       | Age at baseline, exam 1                                                                                                                  |
| age_spiro_baseline | Age at first spirometry exam                                                                                                             |
| bmi                | Body mass index, time variant                                                                                                            |
| edu_cat            | Highest education at baseline:0=No schooling,1=Grades 1-8,2=Grades 9-11,3=High school,4=Some college,5=Bachelor degree,6=Graduate degree |
| gender             | Gender: 1=Male, 0=Female                                                                                                                 |
| race               | Race: 1=White, 2=Asian, 3=Black, 4=Hispanic/Latino, 5= American Indian, 6=Other                                                          |
| race_black         | Black: 1=Yes, 0=No                                                                                                                       |
| race_chinese       | Asian:1=Yes, 0=No                                                                                                                        |
| race_hispanic      | Hispanic/Latino:1=Yes, 0=No                                                                                                              |
| race_amind         | American Indian:1=Yes, 0=No                                                                                                              |
| race_others        | Other Race:1=Yes, 0=No                                                                                                                   |
| race_pacific       | Pacific Islander:1=Yes, 0=No                                                                                                             |
| race_white         | White: 1=Yes, 0=No                                                                                                                       |
| Anthropometry      |                                                                                                                                          |
| ht_cm              | Height (cms), time variant                                                                                                               |
| wt_kg              | Weight (KG), time variant                                                                                                                |
| Spirometry         |                                                                                                                                          |
| pre_fev1           | Forced expiratory volume in one sec (L), time variant                                                                                    |
| pre_fev1_qc_150    | Validity assessment for FEV1 using 2005 ATS/ERS standard: 1=Yes (A,B), 0=No (C,D,F); 2 acceptable curves reproducible within 150 mL      |
| pre_fev1_qc_200    | Validity assessment for FEV1 using 1994 ATS/ERS standard: 1=Yes (A,B,C), 0=No (D,F); 2 acceptable curves reproducible within 200 mL      |
| pre_fev1_qc_grade  | Quality assessment grade for FEV1: A, B, C, D, or F                                                                                      |
| pre_fev1fvc        | Ratio of fev1 over fvc (%), time variant                                                                                                 |

---

|                    |                                                                                                                                                     |
|--------------------|-----------------------------------------------------------------------------------------------------------------------------------------------------|
| pre_fev1fvc_qc_150 | Validity assessment for FEV1/FVC using 2005 ATS/ERS standard: 1=(pre_fev1_qc_150=1 and pre_fvc_qc_150=1); 0=(pre_fev1_qc_150=0 or pre_fvc_qc_150=0) |
| pre_fev1fvc_qc_200 | Validity assessment for FEV1/FVC using 1994 ATS/ERS standard: 1=(pre_fev1_qc_200=1 and pre_fvc_qc_200=1); 0=(pre_fev1_qc_200=0 or pre_fvc_qc_200=0) |
| pre_fvc            | Forced vital capacity (L), time variant                                                                                                             |
| pre_fvc_qc_150     | Validity assessment for FVC using 2005 ATS/ERS standard: 1=Yes (A,B), 0=No (C,D,F); 2 acceptable curves reproducible within 150 mL                  |
| pre_fvc_qc_200     | Validity assessment for FVC using 1994 ATS/ERS standard: 1=Yes (A,B,C), 0=No (D,F); 2 acceptable curves reproducible within 200 mL                  |
| pre_fvc_qc_grade   | Quality assessment grade for FVC: A, B, C, D, or F                                                                                                  |
| timefactor_spiro   | Time from baseline spirometry exam, years                                                                                                           |

#### Events

|                        |                                                                                                                                                                                                             |
|------------------------|-------------------------------------------------------------------------------------------------------------------------------------------------------------------------------------------------------------|
| SOLE                   | Severe Obstructive Lung Event (SOLE): Death or hospitalization with CLRD adjudicated as primary/underlying cause or CLRD ICD-coded as primary discharge diagnosis or underlying cause of death; 1=Yes, 0=No |
| tty_SOLE               | Time to Severe Obstructive Lung Event (SOLE), years since baseline                                                                                                                                          |
| clrd_related_event     | CLRD-related event: Death or hospitalization with CLRD adjudicated as contributing cause or CLRD ICD-coded in any position; 1=Yes, 0=No                                                                     |
| tty_clrd_related_event | Time to CLRD-related event, years since baseline                                                                                                                                                            |
| death                  | All-cause mortality: 1=Yes, 0=No                                                                                                                                                                            |
| tty_death              | Time to all-cause mortality, years since baseline                                                                                                                                                           |
| clrd_death             | Deaths with CLRD adjudicated as the underlying cause or CLRD ICD-coded as the underlying cause of death: 1=Yes, 0=No                                                                                        |
| clrd-related_death     | Deaths with CLRD adjudicated as a contributing cause or CLRD ICD-coded as a cause of death in any position: 1=Yes, 0=No                                                                                     |

#### Medical history

|                            |                                                               |
|----------------------------|---------------------------------------------------------------|
| pmh_asthm_age_start_base   | Age when asthma started at baseline:1=Yes, 0=No               |
| pmh_asthma_ever_base       | Self reported asthma ever at baseline:1=Yes, 0=No             |
| pmh_asthma_md_base         | Doctor diagnosed asthma at baseline:1=Yes, 0=No               |
| pmh_asthma_still_base      | Still have asthma at baseline:1=Yes, 0=No                     |
| pmh_cbronch_age_start_base | Age when chronic bronchitis started at baseline:1=Yes, 0=No   |
| pmh_cbronchitis_ever_base  | Self reported chronic bronchitis ever at baseline:1=Yes, 0=No |
| pmh_cbronchitis_md_base    | Doctor diagnosed chronic bronchitis at baseline:1=Yes, 0=No   |
| pmh_cbronchitis_still_base | Still have chronic bronchitis at baseline:1=Yes, 0=No         |
| pmh_diabetes_md_base       | Doctor diagnosed diabetes at baseline:1=Yes, 0=No             |
| pmh_emph_age_start_base    | Age when emphysema started at baseline:1=Yes, 0=No            |

---

---

pmh\_emphysema\_ever\_base Self reported emphysema ever at baseline:1=Yes, 0=No

pmh\_emphysema\_md\_base Doctor diagnosed emphysema at baseline:1=Yes, 0=No

pmh\_emphysema\_still\_base Still have emphysema at baseline:1=Yes, 0=No

#### Symptoms

Sx\_MRC\_CB MRC chronic bronchitis (calculated), time variant

Sx\_MRC\_dyspnea MRC dyspnea scale (calculated), time variant

Sx\_cough Have a cough, time variant:1=Yes, 0=No

Sx\_cough\_3months Cough on most days for 3 consecutive months, time variant:1=Yes, 0=No

Sx\_cough\_4days Cough 4-6 times/day for 4 or more days, time variant:1=Yes, 0=No

Sx\_cough\_day\_night Cough at all during day or night, time variant:1=Yes, 0=No

Sx\_cough\_getup Cough at all on getting up, time variant:1=Yes, 0=No

Sx\_cough\_years Number of years had this cough

Sx\_phlegm Bring up phlegm, time variant:1=Yes, 0=No

Sx\_phlegm\_3months Phlegm on most days for 3 consecutive months, time variant:1=Yes, 0=No

Sx\_phlegm\_4days Phlegm 4-6 times/day for 4 or more days, time variant:1=Yes, 0=No

Sx\_phlegm\_day\_night Phlegm at all during day or night, time variant:1=Yes, 0=No

Sx\_phlegm\_getup Phlegm at all on getting up, time variant:1=Yes, 0=No

Sx\_phlegm\_years Number of years had this phlegm

Sx\_sob\_100yards Shortness of breath after walking about 100 yards (or after a few minutes) on the level, time variant:1=Yes, 0=No

Sx\_sob\_noact Too breathless to leave the house or breathless on dressing or undressing, time variant:1=Yes, 0=No

Sx\_sob\_pace Stop for breath when walking at our own pace on the level, time variant:1=Yes, 0=No

Sx\_sob\_slow\_peers Walk slower than people of your age on the level because of breathlessness, time variant:1=Yes, 0=No

Sx\_sob\_uphill Troubled by shortness of breath when hurrying on the level or walking up a slight hill, time variant:1=Yes, 0=No

Sx\_wheeze\_cold Wheezing / whistling in chest when have cold, time variant:1=Yes, 0=No

Sx\_wheeze\_most\_days Wheezing / whistling in chest on most days or nights, time variant:1=Yes, 0=No

Sx\_wheeze\_nocold Wheezing / whistling in chest without cold, time variant:1=Yes, 0=No

Sx\_wheeze\_sob Shortness of breath with wheezing attack, time variant:1=Yes, 0=No

Sx\_wheeze\_years Number of years with wheezing / whistling in chest

#### Medications

meds\_bronc\_dilator Medications: Bronchodilators, time variant:1=Yes, 0=No

---

---

meds\_steroids Medications: Steroids, time variant:1=Yes, 0=No

Smoking

smoking\_cigs\_perday Cigarettes smoked per day

smoking\_cigs\_perday\_base Cigarettes smoked per day at baseline visit

smoking\_current Current smoker, time variant:1=Yes, 0=No

smoking\_current\_baseline Current smoker at baseline:1=Yes, 0=No

smoking\_ever Ever smoker, time variant:1=Yes, 0=No

smoking\_ever\_baseline Ever smoker at baseline:1=Yes, 0=No

smoking\_former Former smoker, time variant:1=Yes, 0=No

smoking\_former\_baseline Former smoker at baseline:1=Yes, 0=No

smoking\_packyears Cigarettes pack years, time variant

smoking\_packyears\_baseline Cigarettes pack years at baseline visit

smoking\_status 3 levels of smoking status, time variant:0=Never, 1=Former, 2=Current

smoking\_status\_baseline 3 levels of smoking status at baseline:1=Yes, 0=No

---

**Web Table 2.** Respiratory Data Completeness, the NHLBI Pooled Cohorts Study, 1983-2016.

| <b>Participants in NHLBI PCS</b>  |                           |          |                           |          |
|-----------------------------------|---------------------------|----------|---------------------------|----------|
| <i>n</i> = 65,251                 |                           |          |                           |          |
|                                   | <b>Complete and valid</b> |          | <b>Missing or invalid</b> |          |
|                                   | <b>No.</b>                | <b>%</b> | <b>No.</b>                | <b>%</b> |
| Standard covariates               |                           |          |                           |          |
| Age                               | 65,250                    | 100.0    | 1                         | 0.0      |
| Sex                               | 65,251                    | 100.0    | 0                         | 0.0      |
| Race/ethnicity                    | 65,251                    | 100.0    | 0                         | 0.0      |
| Height (cms)                      | 65,165                    | 99.9     | 86                        | 0.1      |
| Body mass index (kg/m2)           | 65,098                    | 99.8     | 153                       | 0.2      |
| Education                         | 63,833                    | 97.8     | 1,418                     | 2.2      |
| Smoking status                    | 65,056                    | 99.7     | 195                       | 0.3      |
| Pack years of smoking at baseline | 63,538                    | 97.4     | 1,71                      | 2.6      |
| Chronic lung disease              |                           |          |                           |          |
| Self-reported diagnosis           | 62,943                    | 96.5     | 2,308                     | 3.5      |
| Dyspnea                           | 64,021                    | 98.1     | 1,230                     | 1.9      |
| Chronic bronchitis <sup>a</sup>   | 58,091                    | 89.0     | 7,160                     | 11.0     |
| FEV1                              | 55,013                    | 84.3     | 10,238                    | 15.7     |
| FVC                               | 54,387                    | 83.4     | 10,864                    | 16.6     |
| CLRD events follow-up             |                           |          |                           |          |
| CLRD mortality                    | 37,982                    | 58.2     | 27,269 <sup>b</sup>       | 41.8     |
| CLRD hospitalization              | 29,352                    | 45.0     | 35,899 <sup>b</sup>       | 55.0     |

CLRD = chronic lower respiratory disease; FEV1 = forced expiratory volume in one second; FVC = forced vital capacity; PCS = Pooled Cohorts Study.

<sup>a</sup>Defined by mMRC criteria as cough for at least consecutive 3 months for the last 2 years. Among 11.6% of the sample, in which the mMRC questions were incompletely administered and missing the question of how many years of cough, endorsement of cough for at least consecutive 3 months was classified as chronic bronchitis.

<sup>b</sup>CLRD mortality were not defined in two cohorts (FHS, JHS) and CLRD hospitalizations were not defined in 4 out of 9 cohorts (CARDIA, FHS, JHS, SHS). Although HCHS/SOL is ascertaining CLRD mortality, hospitalizations, and Emergency Department visits, these data were not available at time of manuscript preparation (March 2018).

**Web Table 3.** Within- and Between-Individual Variability in Spirometry Measures According to Harmonized Quality Rubric, the NHLBI Pooled Cohorts Study, United States, 1983-2016.

|                 |                             | All available<br>spirometry | Spirometry grade |             |             |             |             |
|-----------------|-----------------------------|-----------------------------|------------------|-------------|-------------|-------------|-------------|
|                 |                             |                             | A                | B           | C           | D           | F           |
| N, participants |                             | 59,508                      | 38,059           | 26,448      | 4,699       | 6,196       | 3,364       |
| N, spirometry   |                             | 120,933                     | 65,294           | 40,402      | 4,939       | 6,643       | 3,655       |
| N, repeated     |                             | 31,208                      | 13,126           | 12,743      | 229         | 436         | 259         |
| FEV1            |                             |                             |                  |             |             |             |             |
|                 | Mean (SD)                   | 2.69 (0.88)                 | 2.71 (0.91)      | 2.69 (0.79) | 2.48 (0.93) | 2.60 (0.90) | 2.63 (1.02) |
|                 | Variance                    |                             |                  |             |             |             |             |
|                 | Within-individual           | 0.11                        | 0.06             | 0.07        | 0.08        | 0.17        | 0.15        |
|                 | Between-individual          | 0.48                        | 0.48             | 0.50        | 0.46        | 0.45        | 0.52        |
|                 | ICC                         | 0.82                        | 0.89             | 0.87        | 0.85        | 0.73        | 0.78        |
|                 | Outliers, N (%)             | 1,443 (1.19)                | 755 (1.16)       | 510 (1.26)  | 70 (1.42)   | 82 (1.23)   | 54 (1.48)   |
|                 | >15% annual increase, N (%) | 68 (0.22)                   | 9 (0.07)         | 10 (0.08)   | 2 (0.87)    | 2 (0.46)    | 5 (1.93)    |
| FVC             |                             |                             |                  |             |             |             |             |
|                 | Mean (SD)                   | 3.52 (1.07)                 | 3.50 (1.09)      | 3.61 (1.01) | 3.22 (1.11) | 3.41 (1.13) | 3.48 (1.26) |
|                 | Variance                    |                             |                  |             |             |             |             |
|                 | Within-individual           | 0.15                        | 0.08             | 0.11        | 0.11        | 0.29        | 0.23        |
|                 | Between-individual          | 0.78                        | 0.77             | 0.83        | 0.79        | 0.74        | 0.90        |
|                 | ICC                         | 0.84                        | 0.90             | 0.88        | 0.87        | 0.72        | 0.80        |
|                 | Outliers, N (%)             | 1,573 (1.30)                | 858 (1.31)       | 478 (1.18)  | 80 (1.62)   | 90 (1.35)   | 38 (1.04)   |
|                 | >15% annual increase, N (%) | 47 (0.15)                   | 8 (0.06)         | 5 (0.04)    | 1 (0.44)    | 4 (0.92)    | 6 (2.32)    |

FEV1 = forced expiratory volume in one second; FVC = forced vital capacity; ICC = intra-class correlation; SD = standard deviation.

**Web Figure 1.** Timeline for Exams Among Cohorts Included in the Pooled Cohorts Study, United States, 1983-2016. Study logos used with cohorts' written permission. ARIC = Atherosclerosis Risk in Communities; CARDIA = Coronary Artery Risk Development in Young Adults; CHS = Cardiovascular Health Study; FHS-O = Framingham Offspring Study; HABC = Health ABC; HCHS/SOL = Hispanic Community Health Study/Study of Latinos; JHS = Jackson Heart Study; MESA = Multi-Ethnic Study of Atherosclerosis; SHS = Strong Heart Study.

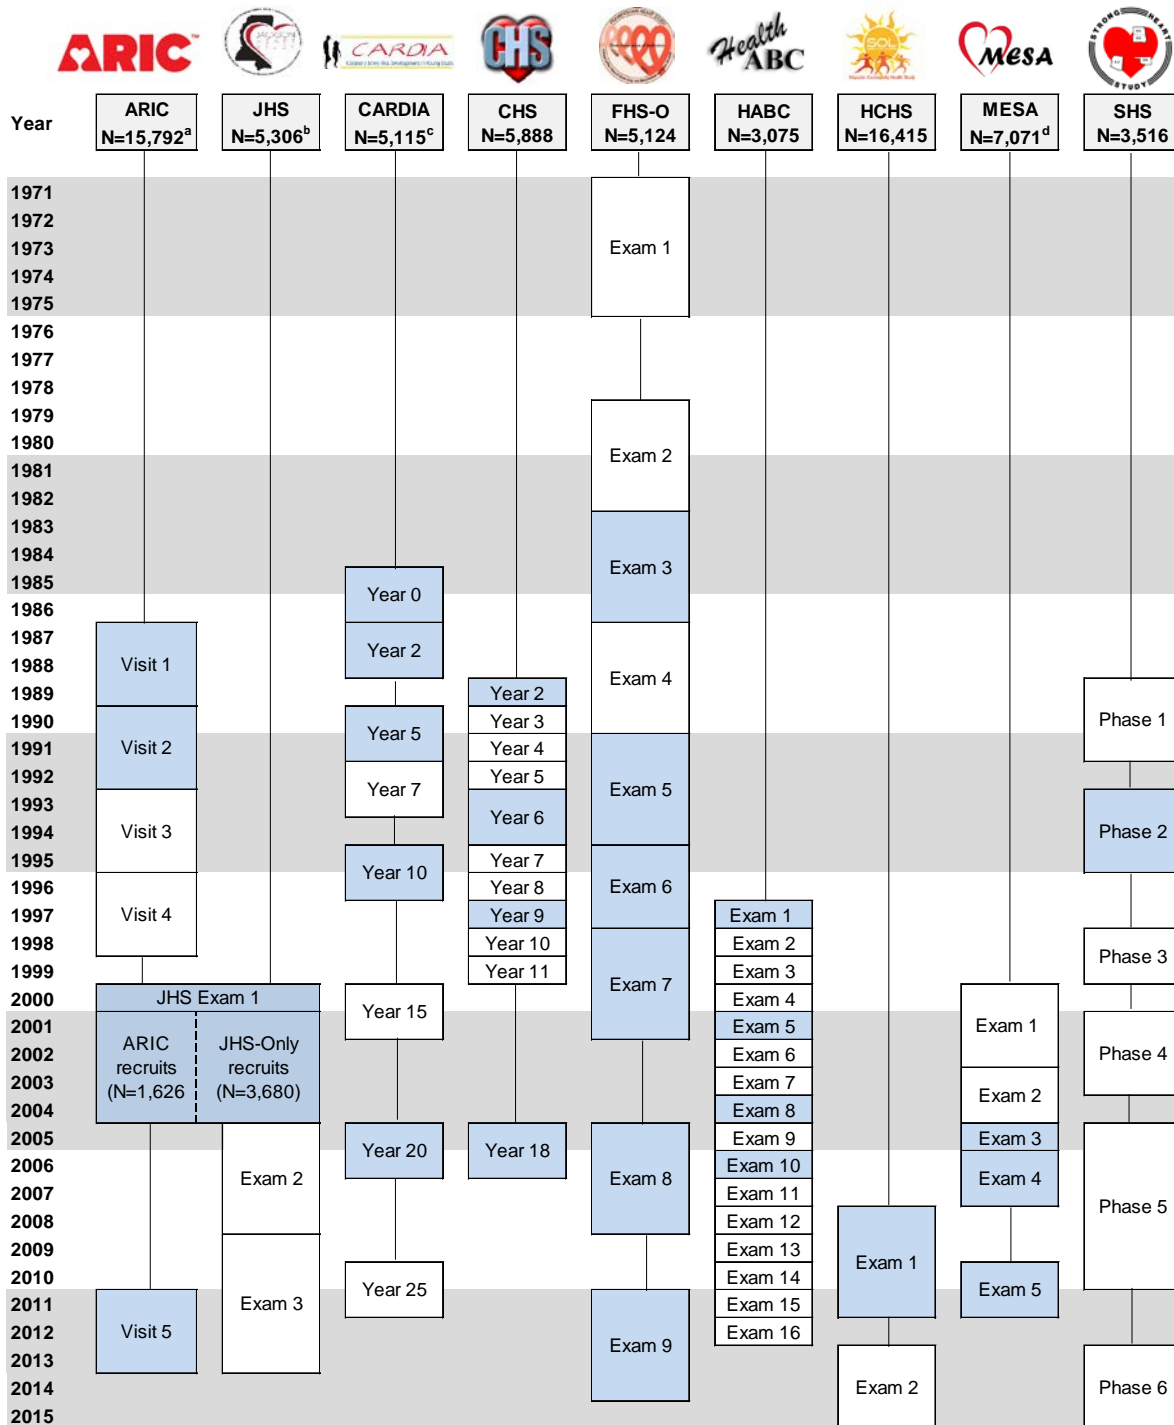

<sup>a</sup> 424 gave restricted consent

<sup>b</sup> Includes 1,626 participants recruited from ARIC

<sup>c</sup> Withdrawal of consent by one participant

<sup>d</sup> MESA + 257 new recruits into the MESA Air Pollution Study

Visit with Spirometry



**Web Figure 2.** Flow Chart of Longitudinal Lung Function Data in the Atherosclerosis Risk In Communities Study, by Visit, United States, 1989-2013.

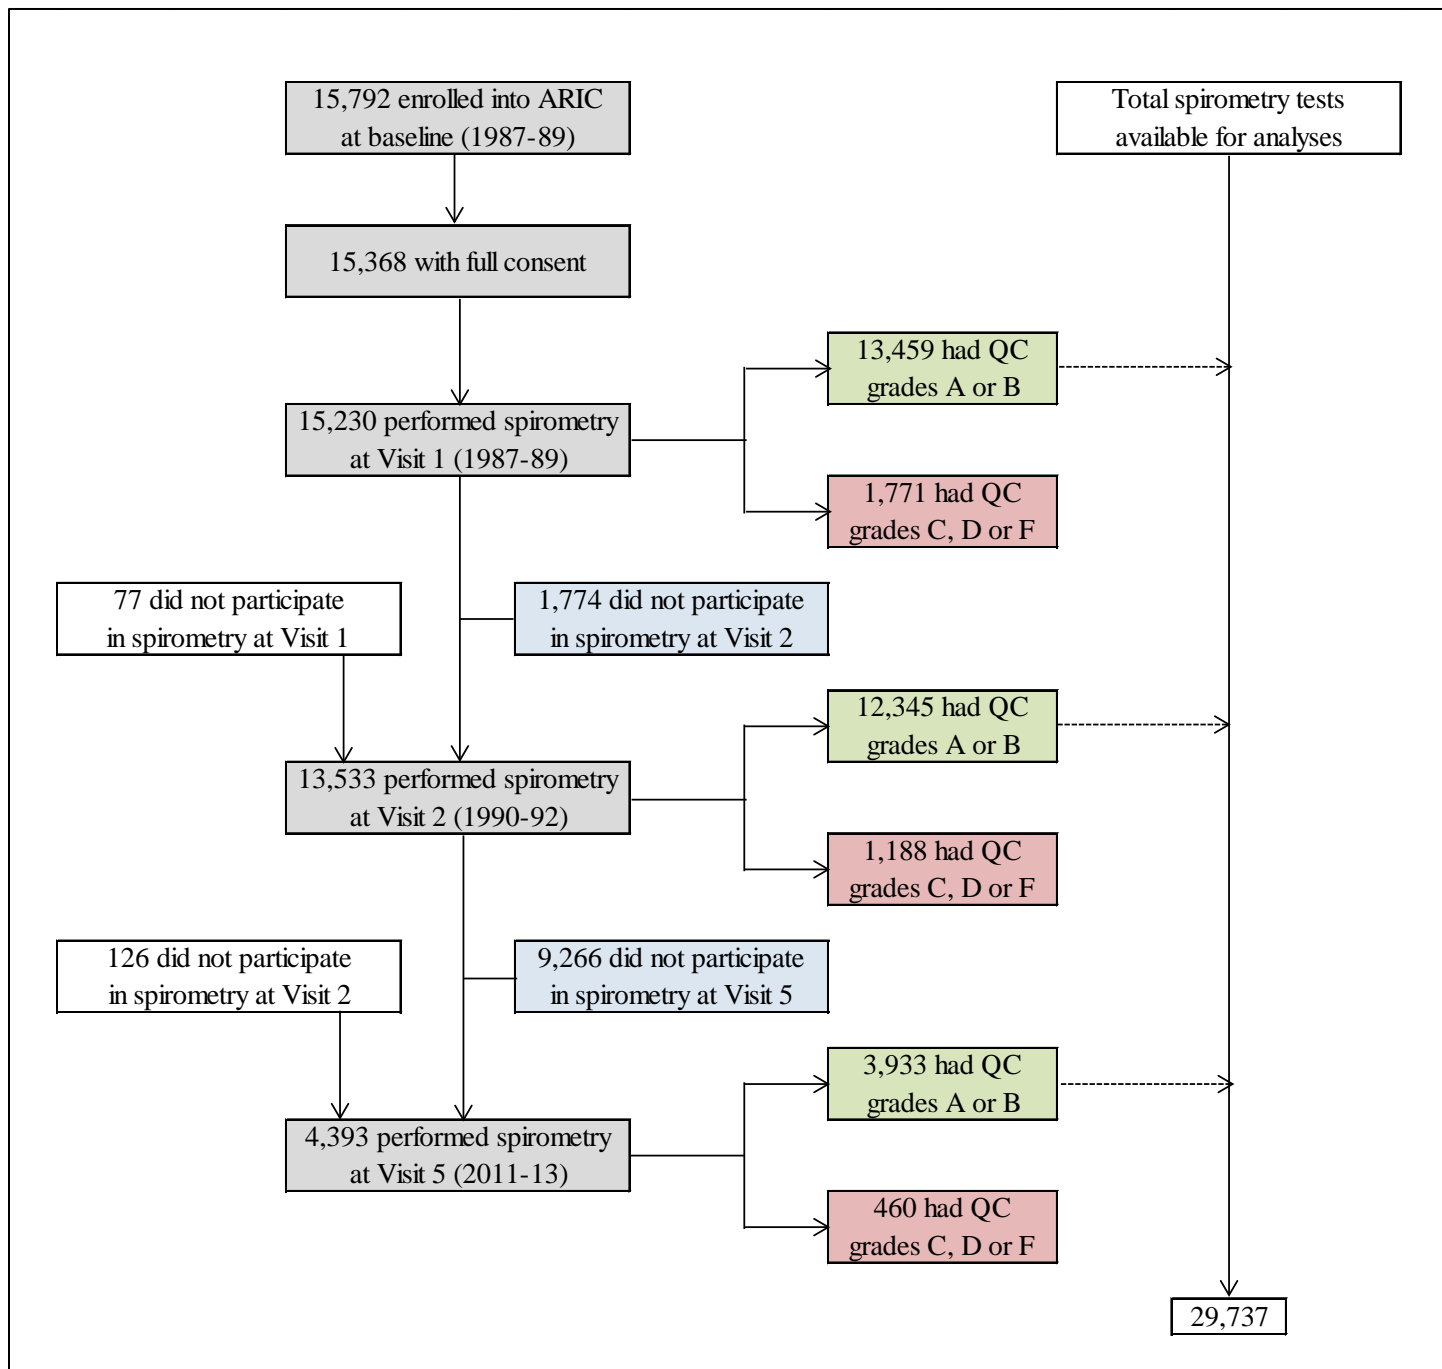

**Web Figure 3.** Flow Chart of Longitudinal Lung Function Data in the Coronary Artery Risk Development in Young Adults Study, by Visit, United States, 1985-2011.

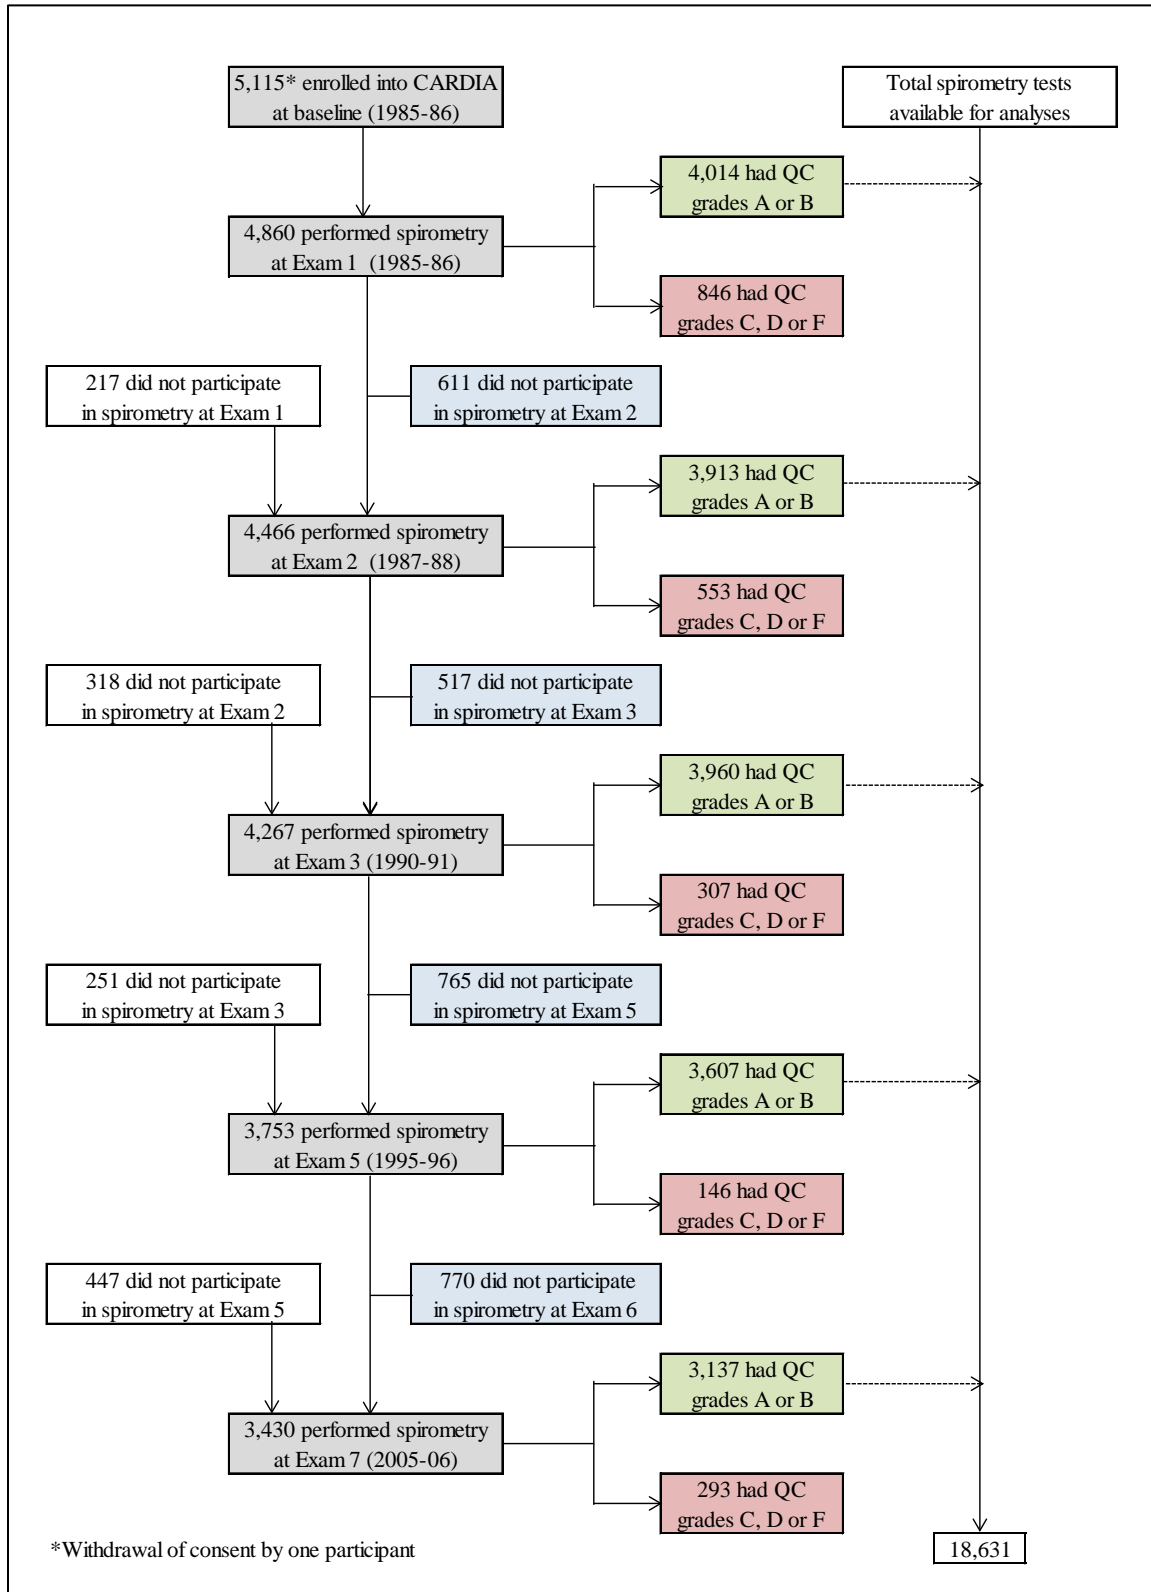

**Web Figure 4.** Flow Chart of Longitudinal Lung Function Data in the Cardiovascular Health Study, by visit, United States, 1989-2006.

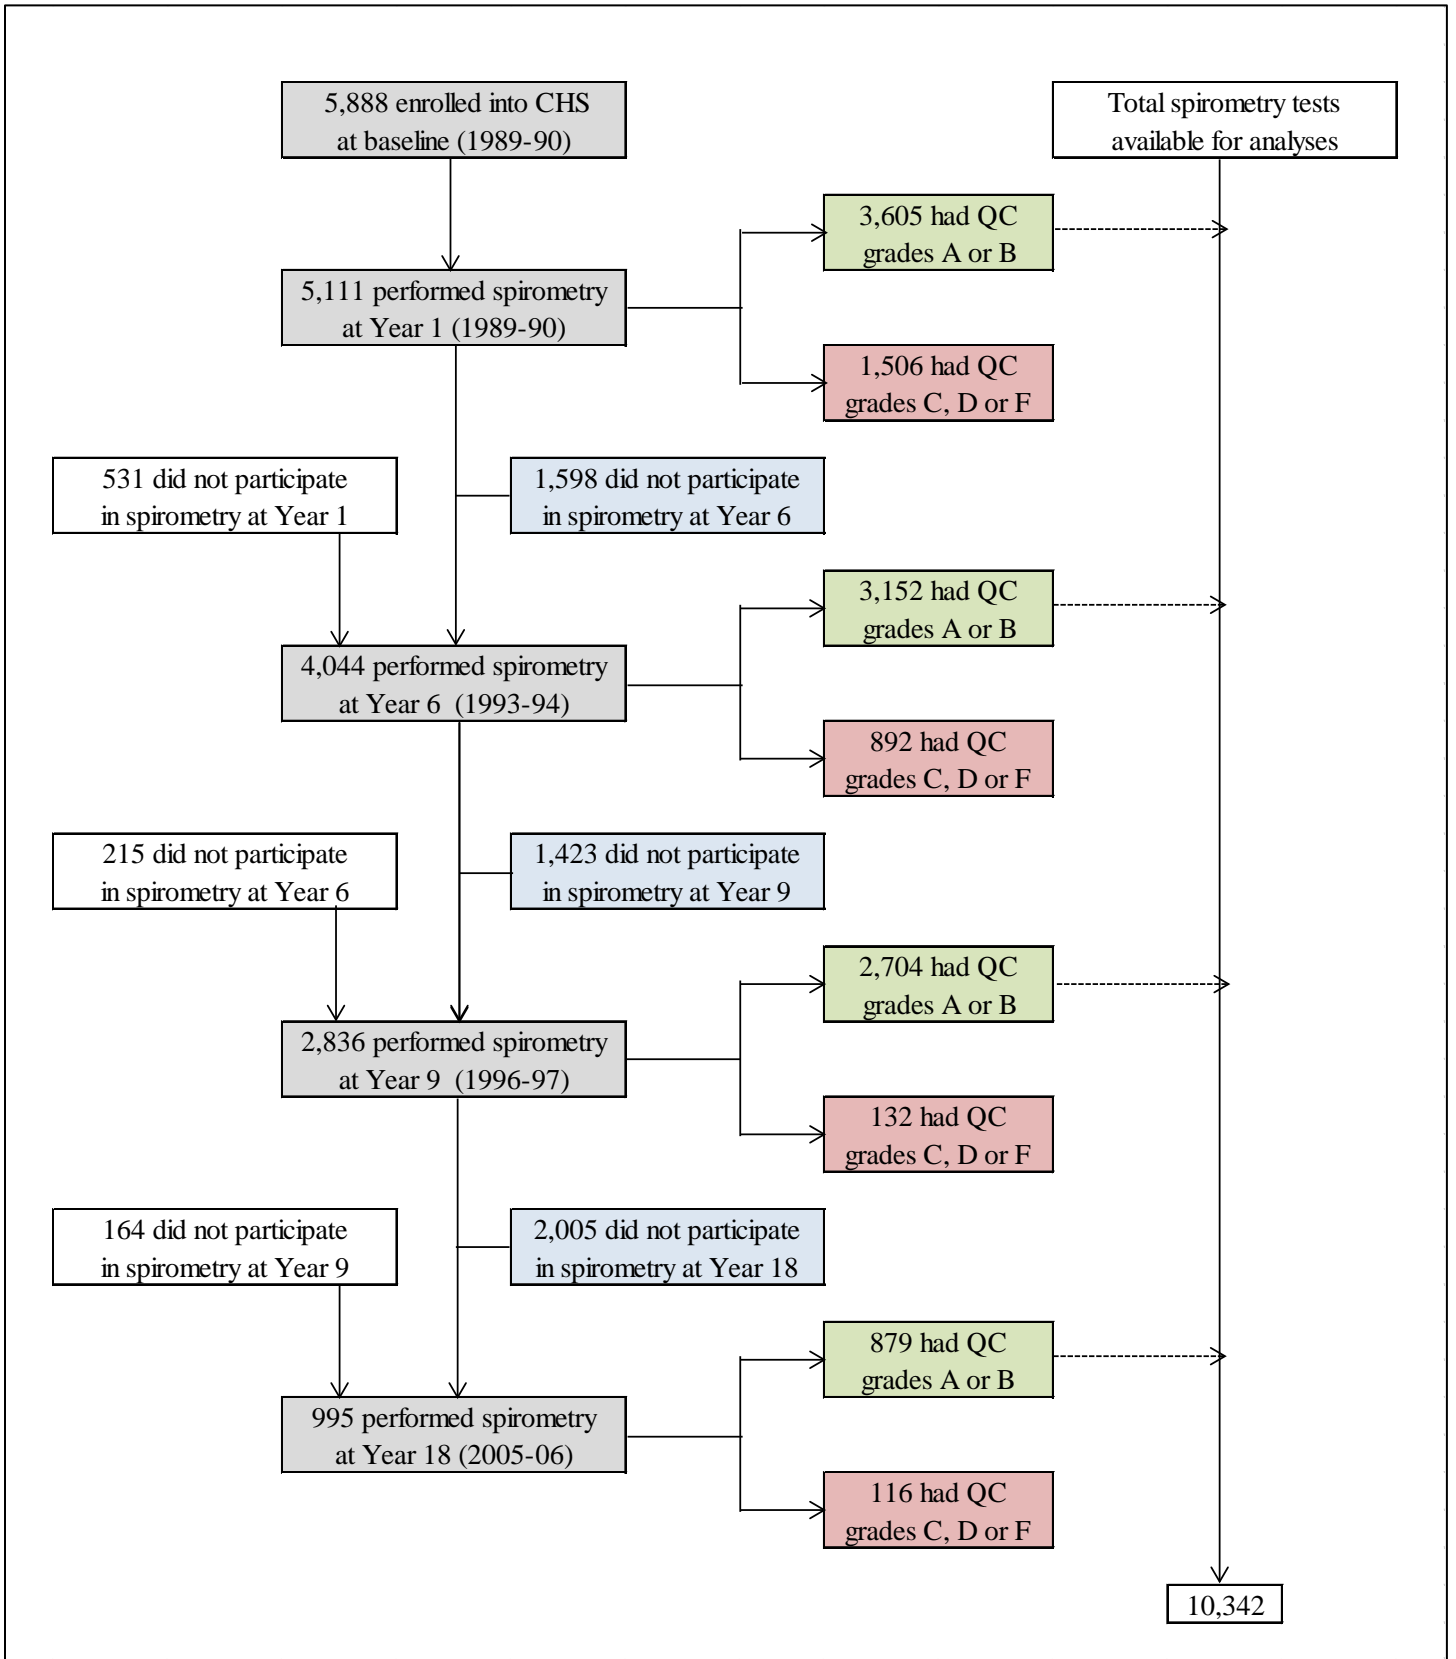

**Web Figure 5.** Flow Chart of Longitudinal Lung Function Data in the Framingham Heart Study-Offspring cohort, by Visit, United States, 1983-2014.

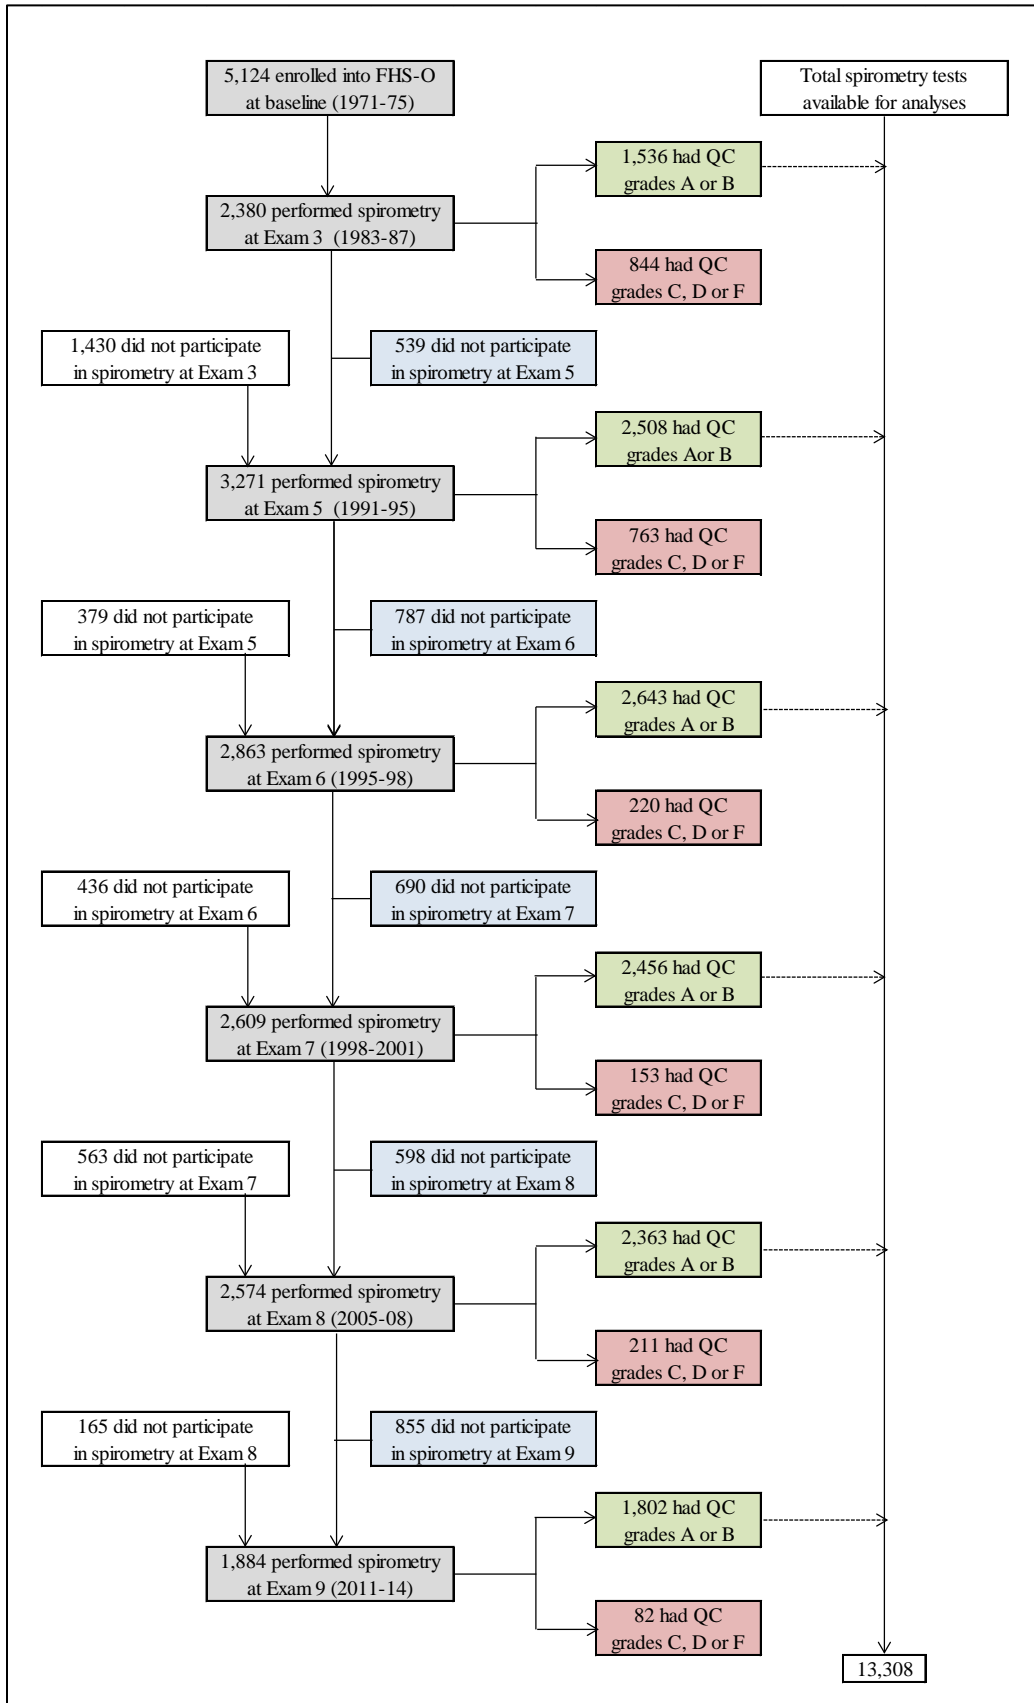

**Web Figure 6.** Flow Chart of Longitudinal Lung Function Data in the Health, Aging and Body Composition Study, by Visit, United States, 1997-2006.

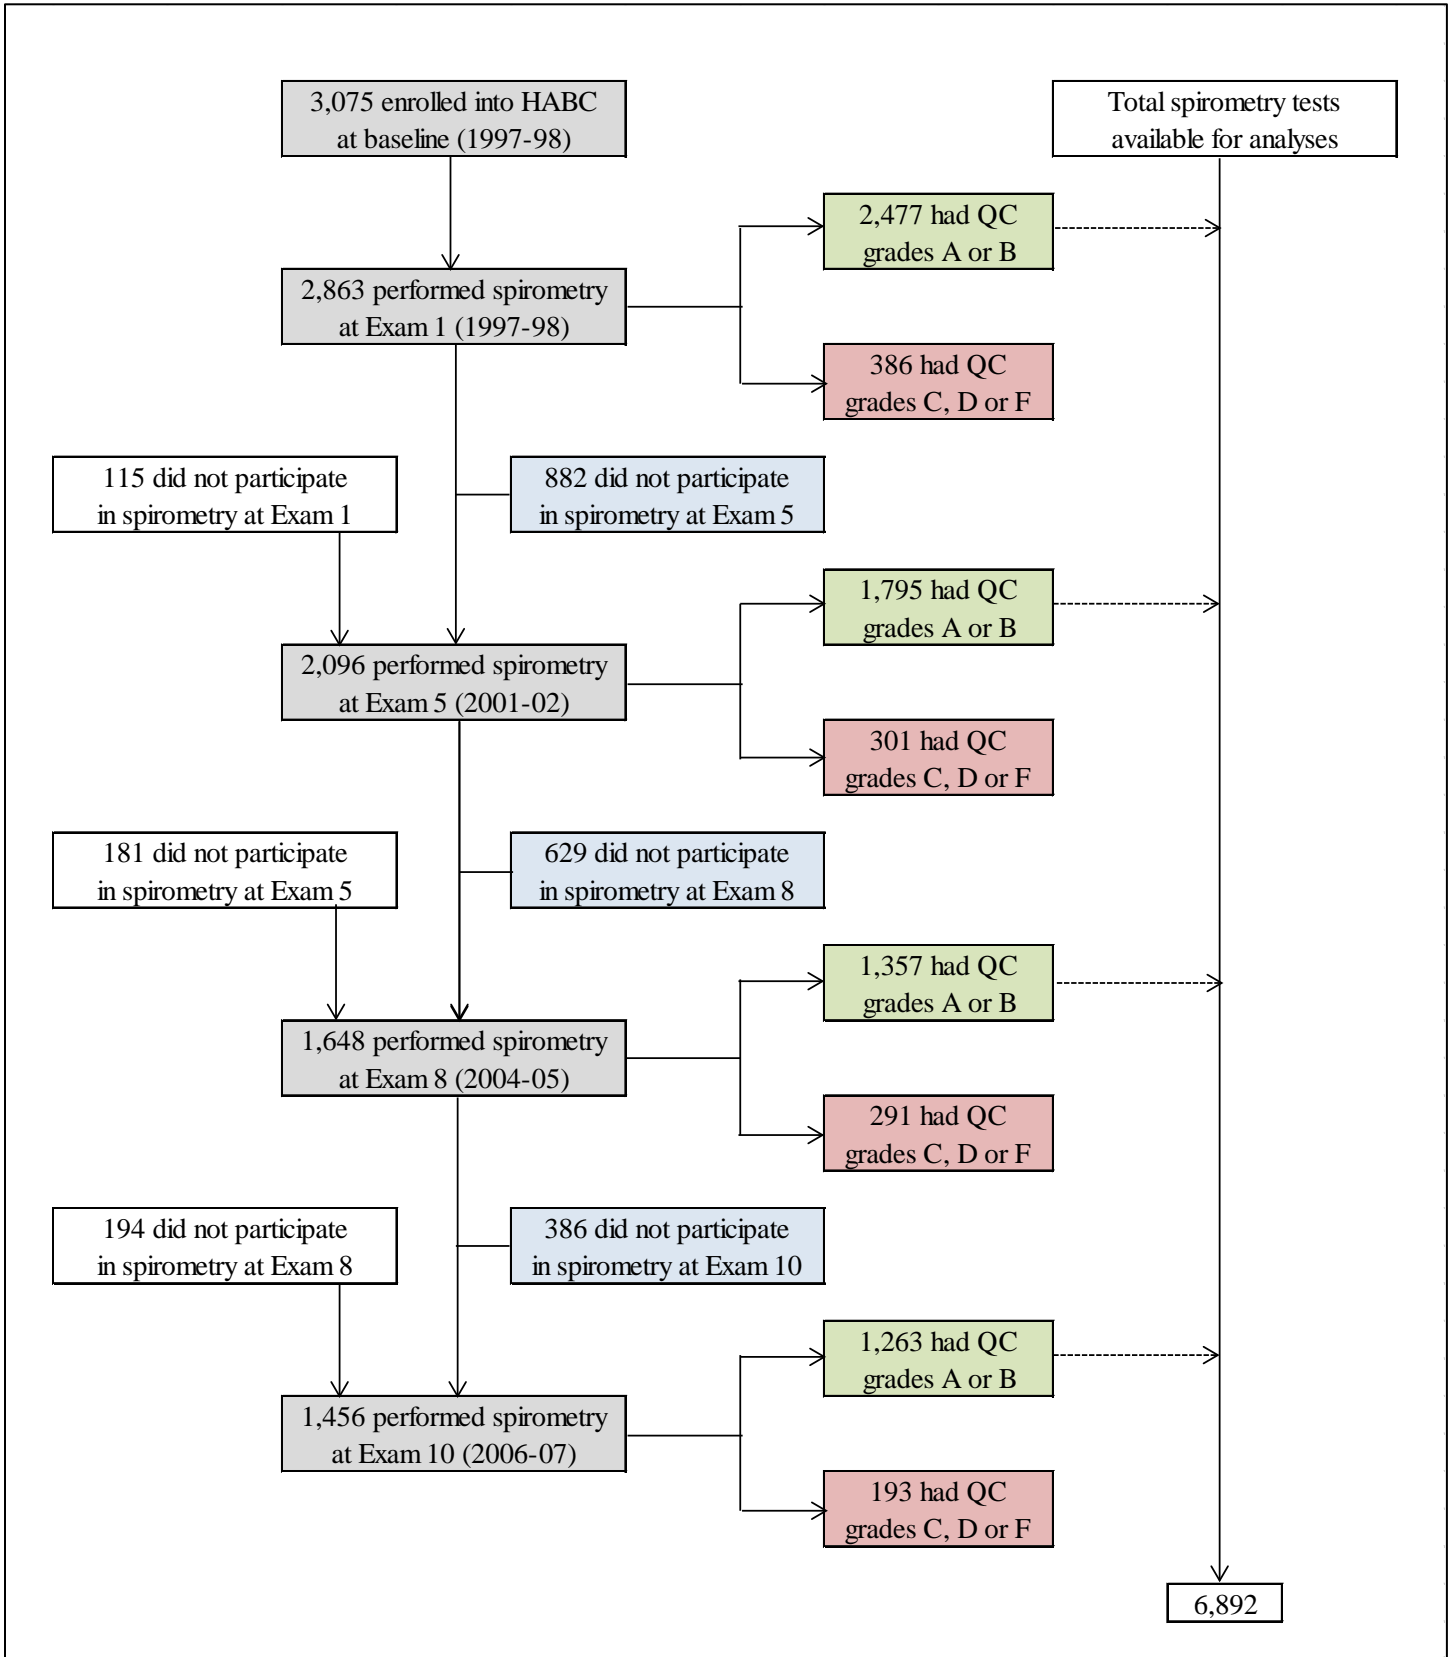

**Web Figure 7.** Flow Chart of Longitudinal Lung Function Data in the Multi-Ethnic Study of Atherosclerosis, by Visit, United States, 2003-2012.

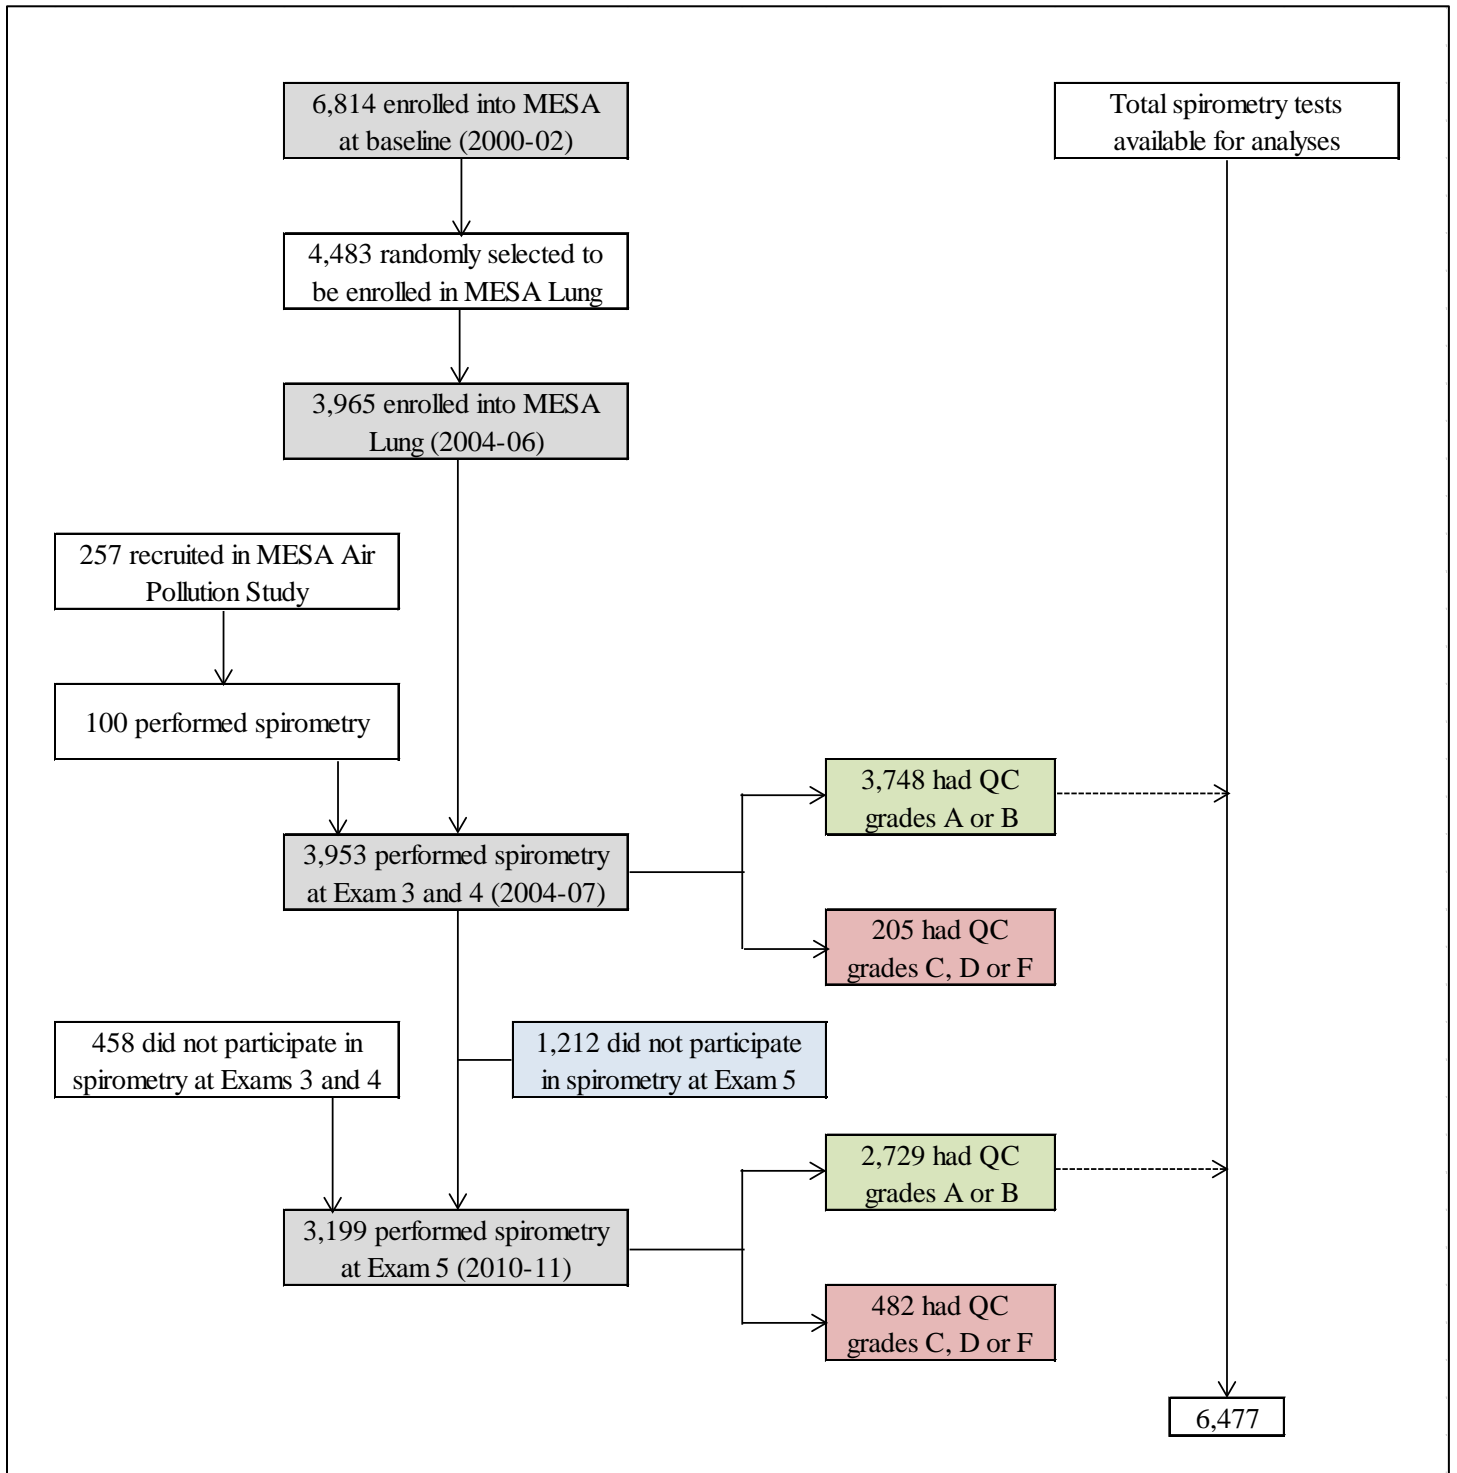

Supplement: kwy139_oelsner_web_material_final.pdf [file kwy139_oelsner_web_material_final.pdf]
